# Supplementary material for: Thermo-oxidative conversion of PDC as a molecular model of residual feedstocks to oxygen-rich chemicals
Source: Royal Society of Chemistry journal article supplement (doi:10.1039/d3re00036b), 2023-01-01
Supplement: d3re00036b1.pdf [file d3re00036b1.pdf]

# **Thermo-Oxidative Conversion of PDC as a Molecular Model of Residual Feedstocks to Oxygen-Rich Chemicals**

Redhwan Al-Akbari<sup>1</sup>, Maryam Razi<sup>1</sup>, Ismail Badran<sup>2</sup>, Nashaat N. Nassar<sup>1\*</sup>

<sup>1</sup> Department of Chemical and Petroleum Engineering, University of Calgary, 2500 University Drive Northwest, Calgary, Alberta T2N 1N4, Canada

<sup>2</sup> Department of Chemistry, Faculty of Sciences, An-Najah National University, Nablus, Palestine

\*Corresponding author: [nassar@ucalgary.ca](mailto:nassar@ucalgary.ca)

## **Supplementary information**

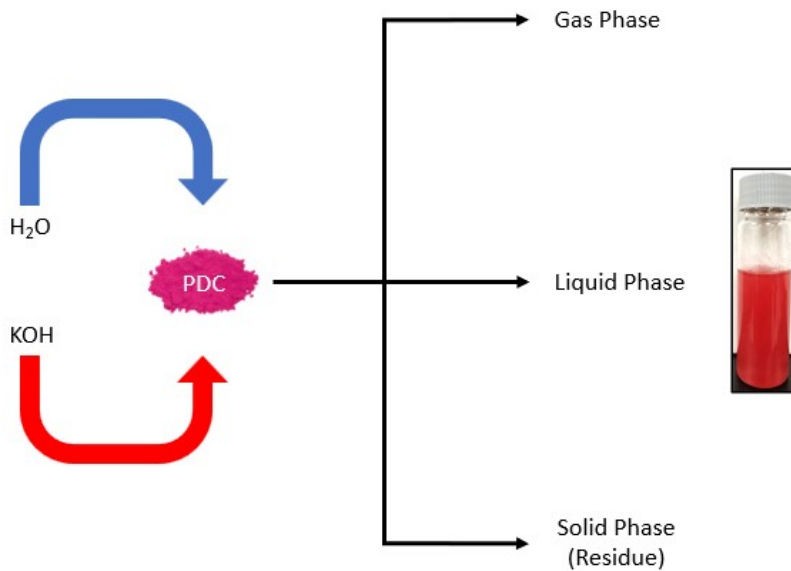

Fig. S1. Schematic showing the three major products of the reaction.

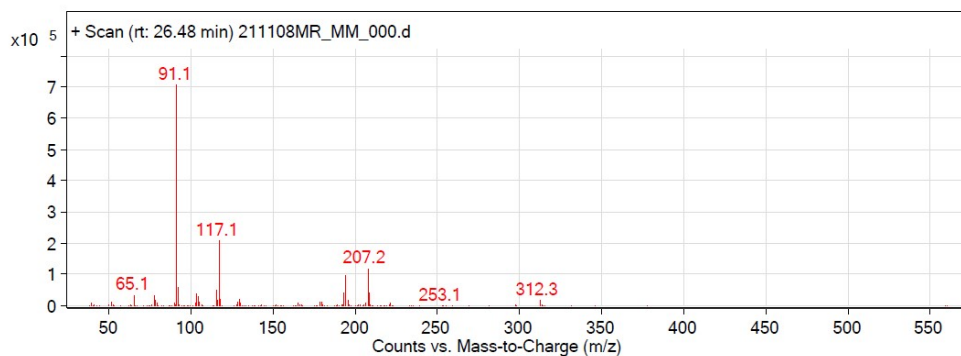

Fig. S2. Mass spectrum for the GCMS peak at retention time of 26.5 min in PDC.

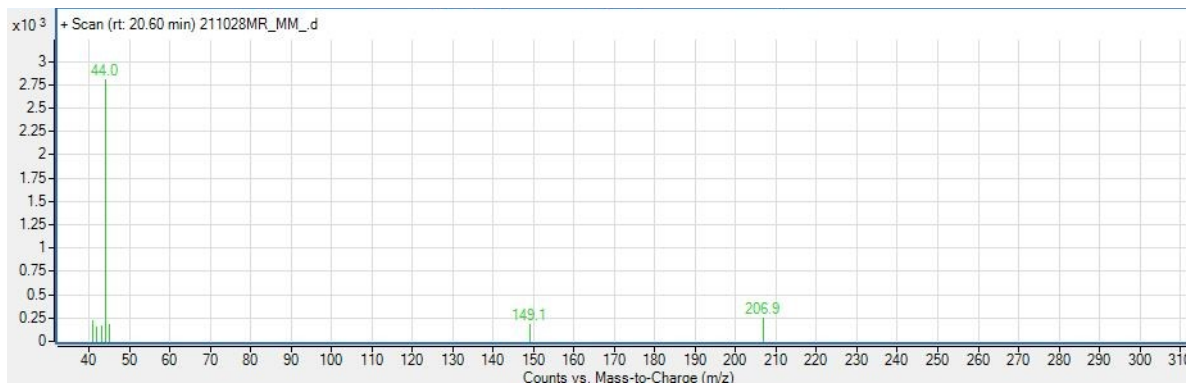

Fig. S3. Mass spectrum for the GCMS peak at retention time of 9 min in PDC.

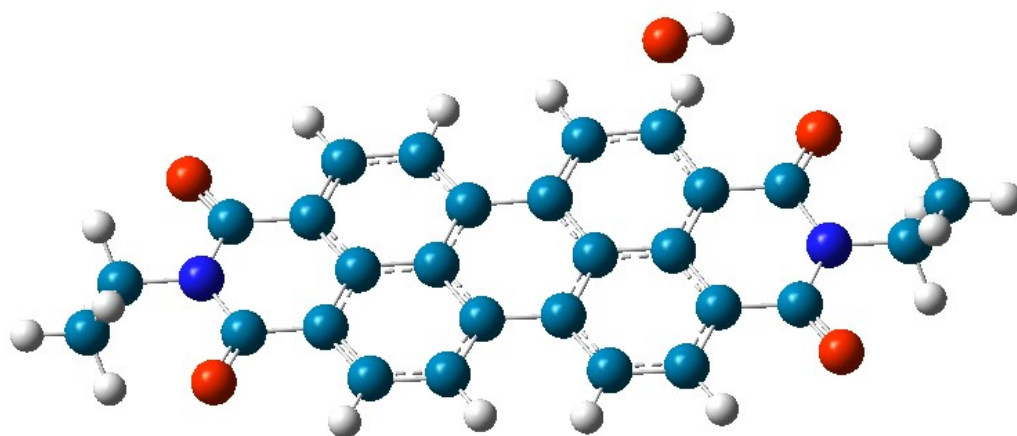

Fig. S4. Optimized geometry for TS1 at M062X/6-31+G(d,p) level of theory.

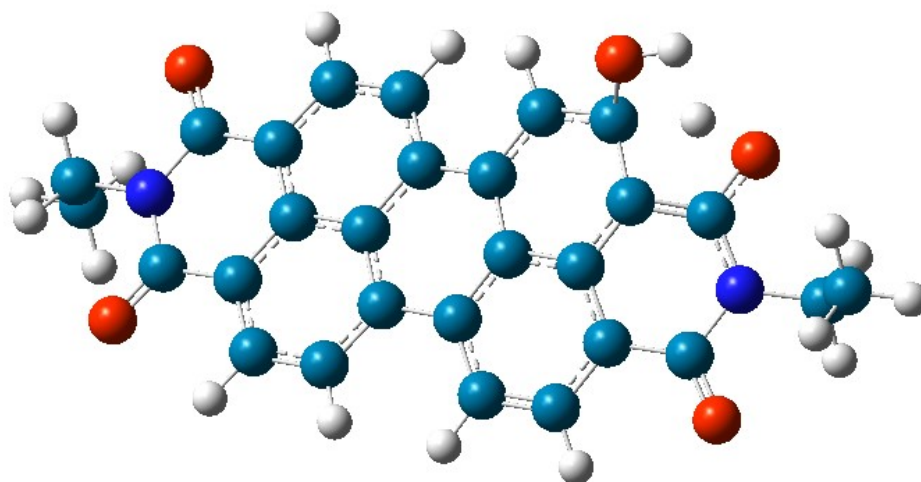

Fig. S5. Optimized geometry for TS2 at M062X/6-31+G(d,p) level of theory.

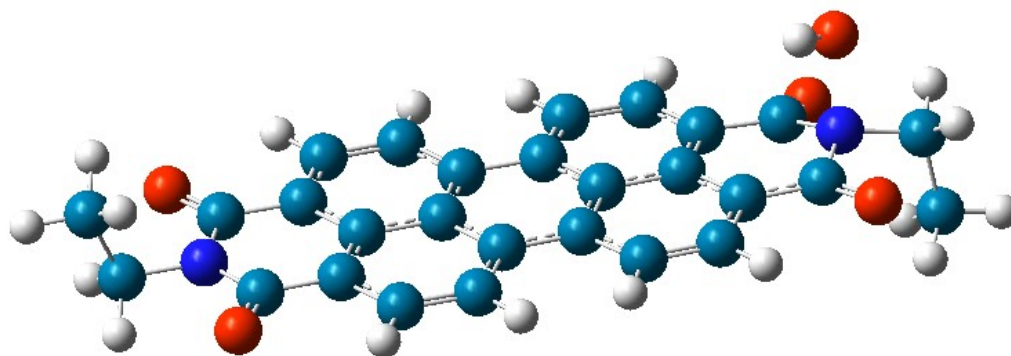

Fig. S6. Optimized geometry for TS3 at M062X/6-31+G(d,p) level of theory.

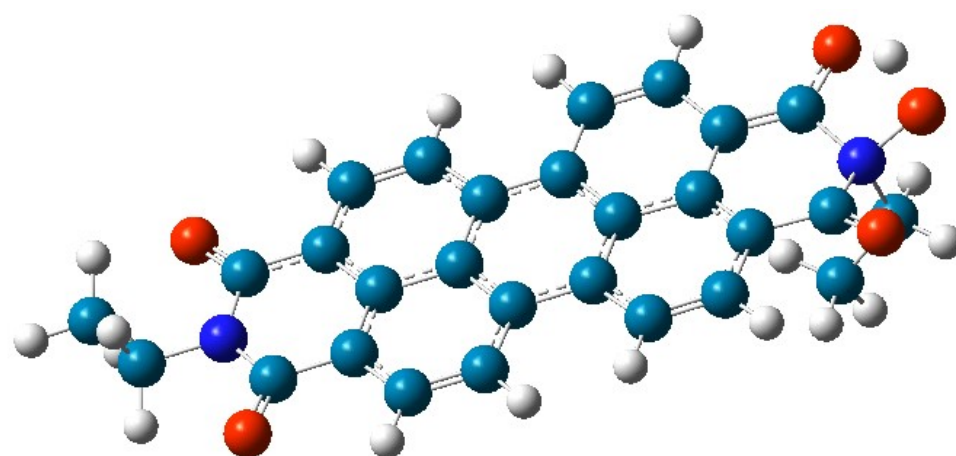

Fig. S7. Optimized geometry for TS4 at M062X/6-31+G(d,p) level of theory.

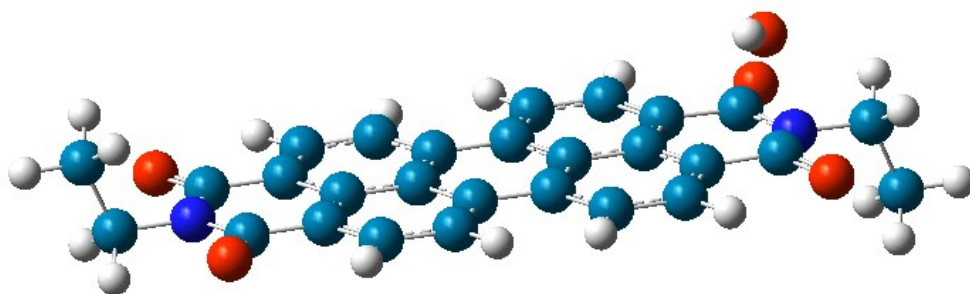

Fig. S8. Optimized geometry for TS5 at M062X/6-31+G(d,p) level of theory.

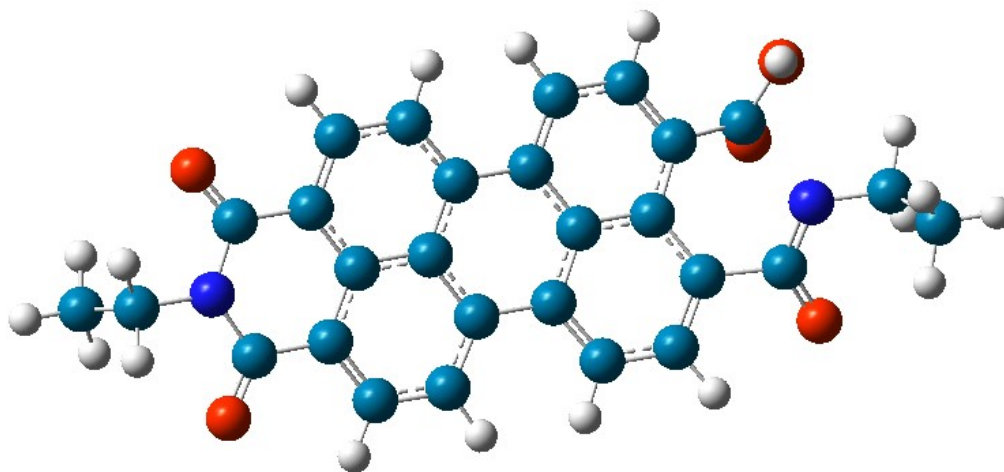

Fig. S9. Optimized geometry for TS6 at M062X/6-31+G(d,p) level of theory.

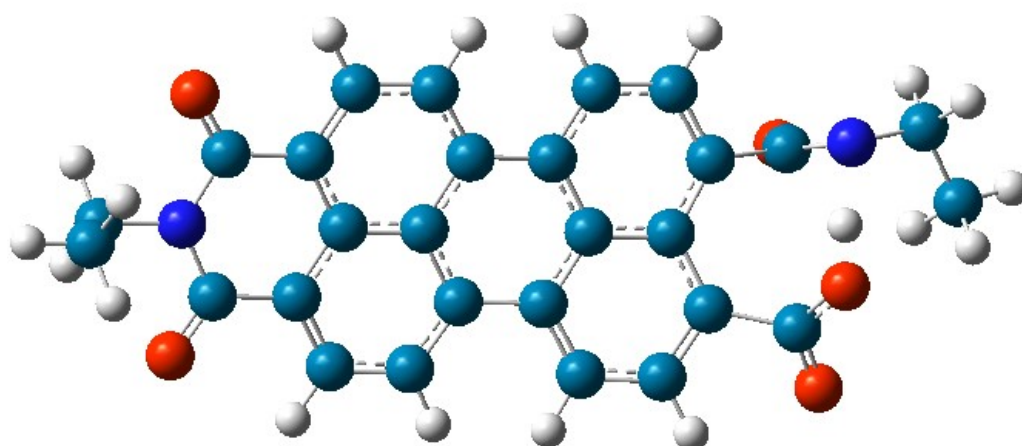

Fig. S10. Optimized geometry for TS7 at M062X/6-31+G(d,p) level of theory.

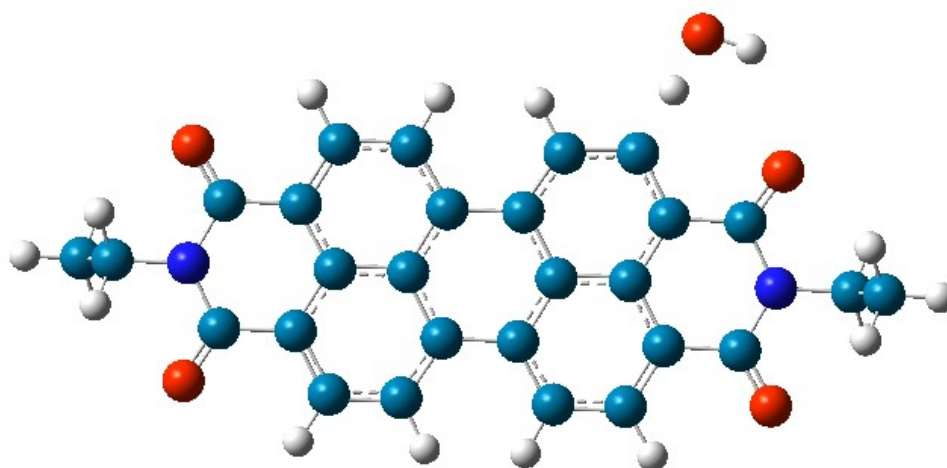

Fig. S11. Optimized geometry for TS8 at M062X/6-31+G(d,p) level of theory.
